# Supplementary material
Source: PubMed Central journal article supplement (PMC3734558)

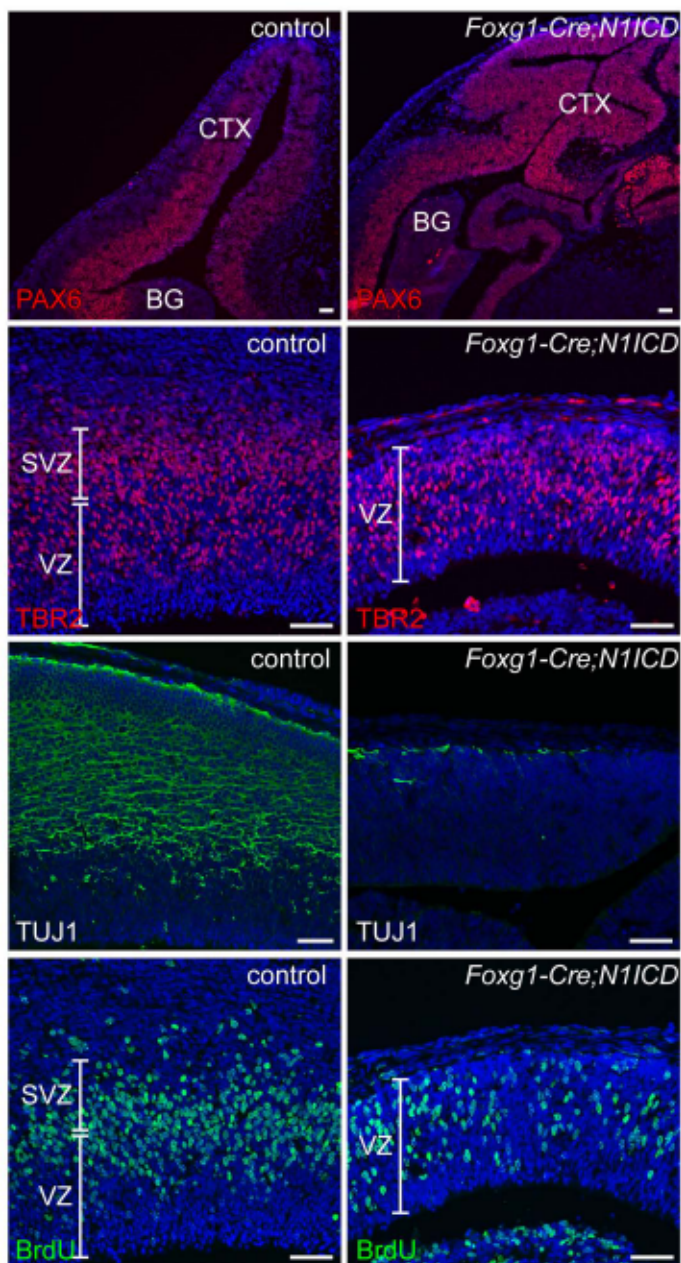

Supplement: NIHMS479429-supplement-Figure_S1.pdf [file NIHMS479429-supplement-Figure_S1.pdf]

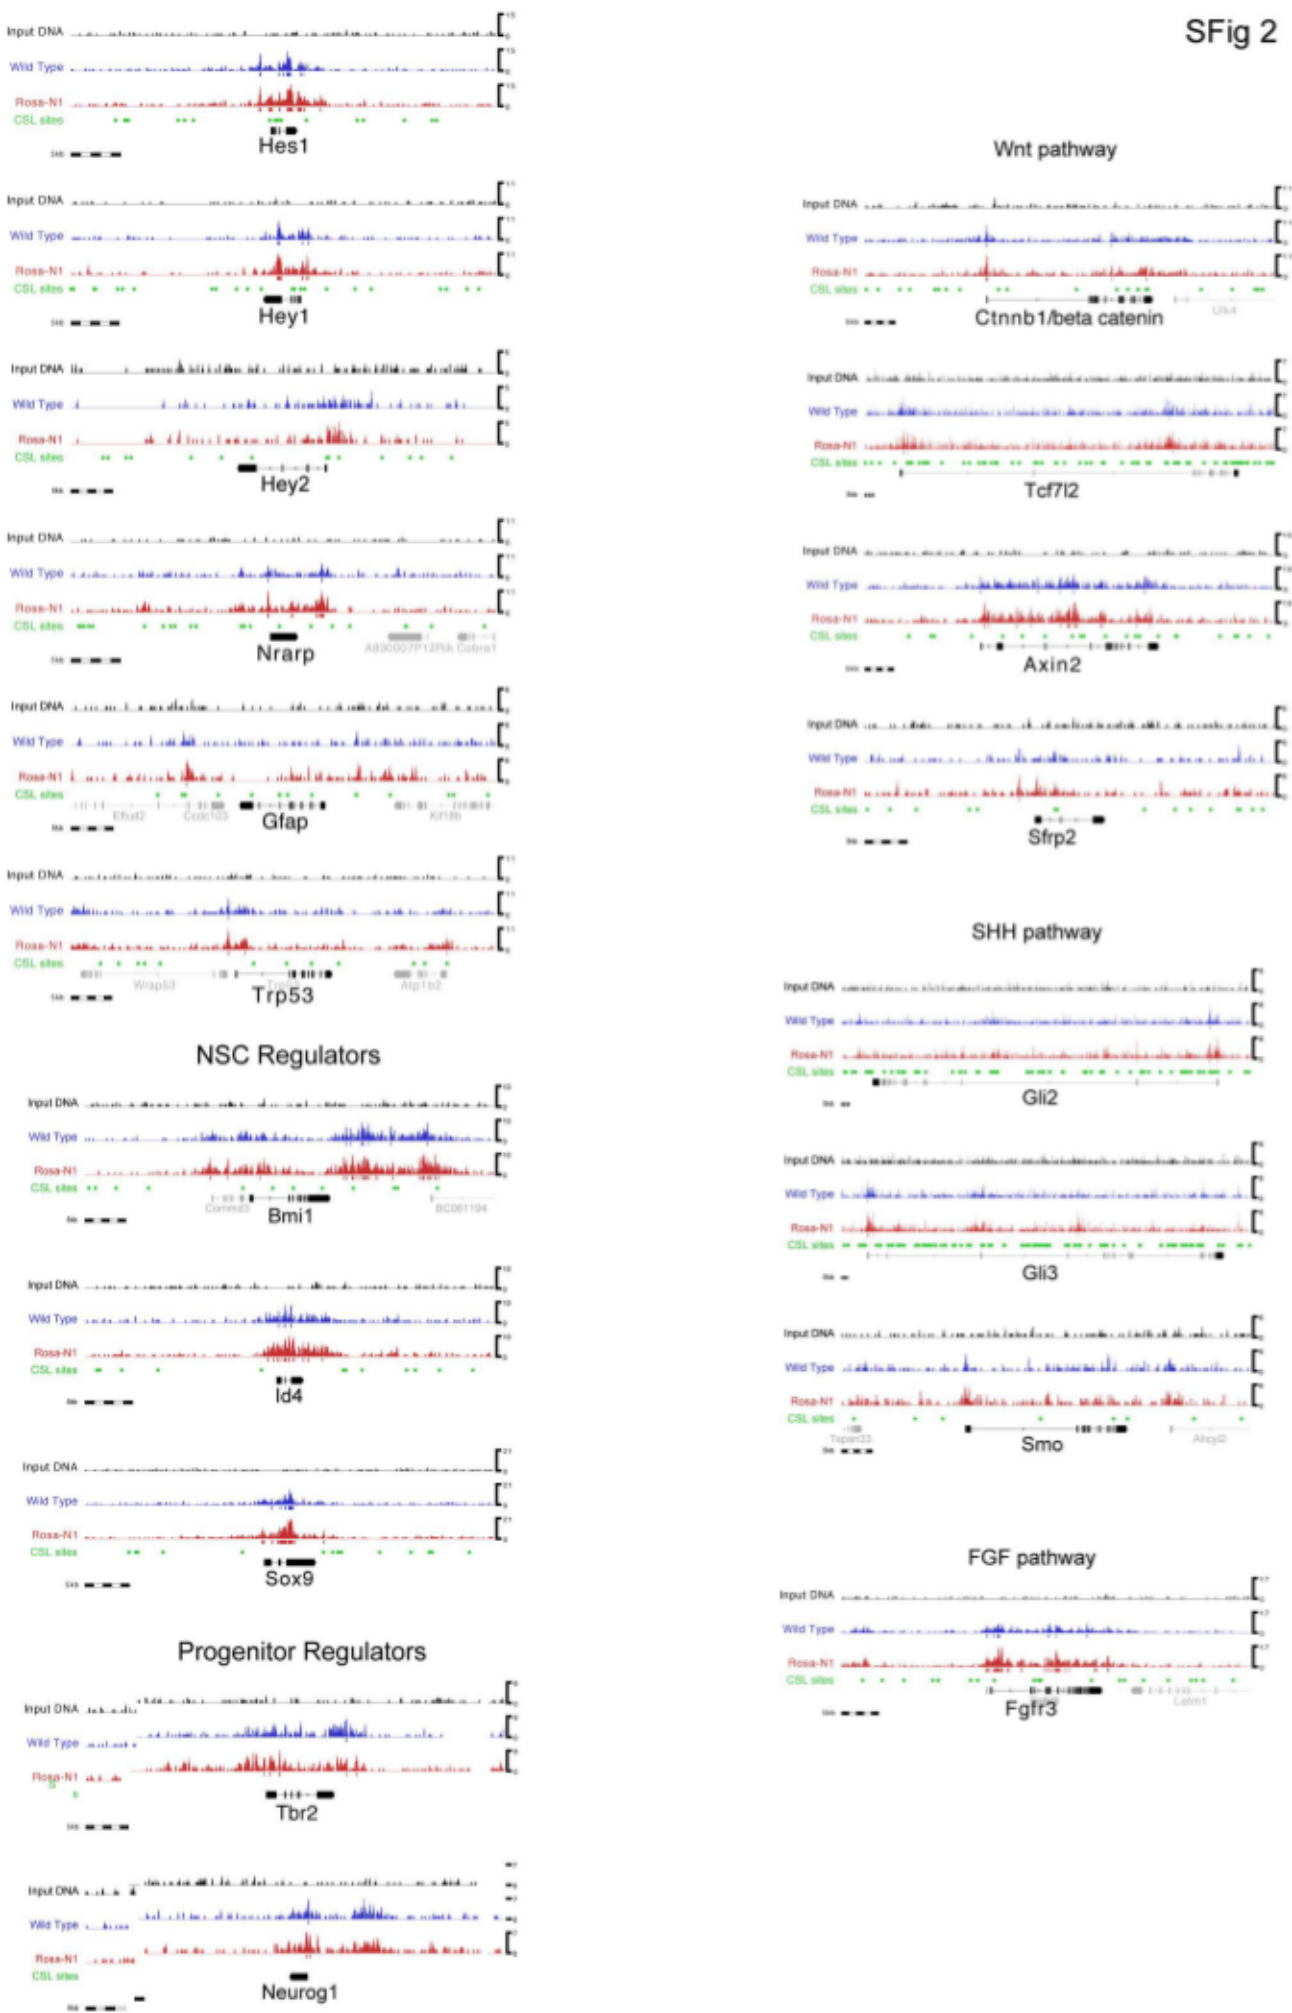

Supplement: NIHMS479429-supplement-Figure_S2.pdf [file NIHMS479429-supplement-Figure_S2.pdf]

## Logo

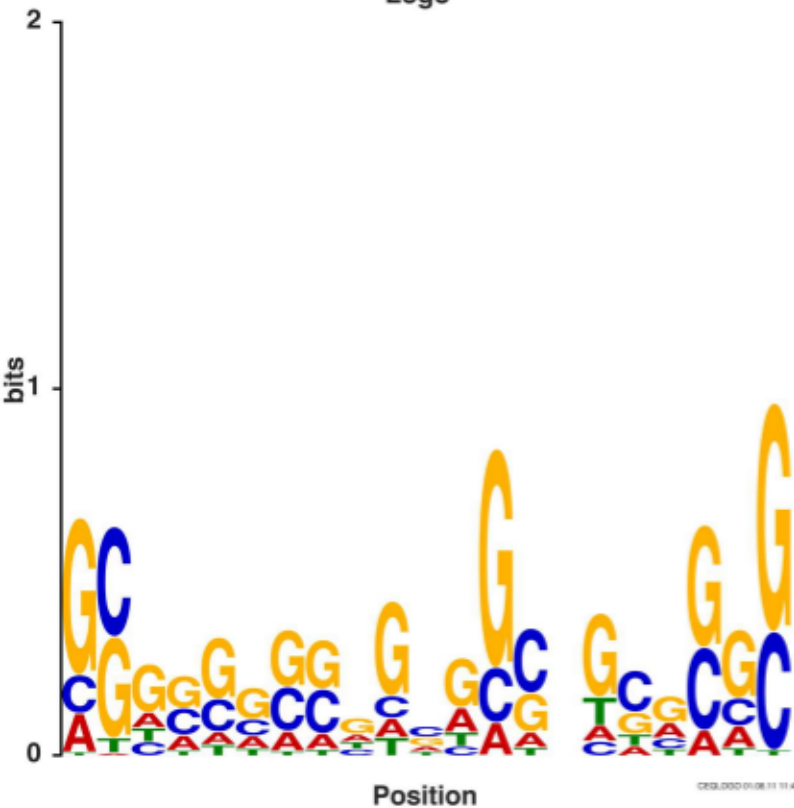

Supplement: NIHMS479429-supplement-Figure_S3.pdf [file NIHMS479429-supplement-Figure_S3.pdf]
